# Supplementary material for: Systematic Literature Review (SLR) and Network Meta-Analysis (NMA) of First-Line Therapies (1L) for Locally Advanced/Metastatic Urothelial Carcinoma (la/mUC)
Source: MDPI journal article supplement (doi:10.3390/curroncol30040277), 2023-03-26
Supplement: s1 [file s1]

## Supplementary Materials

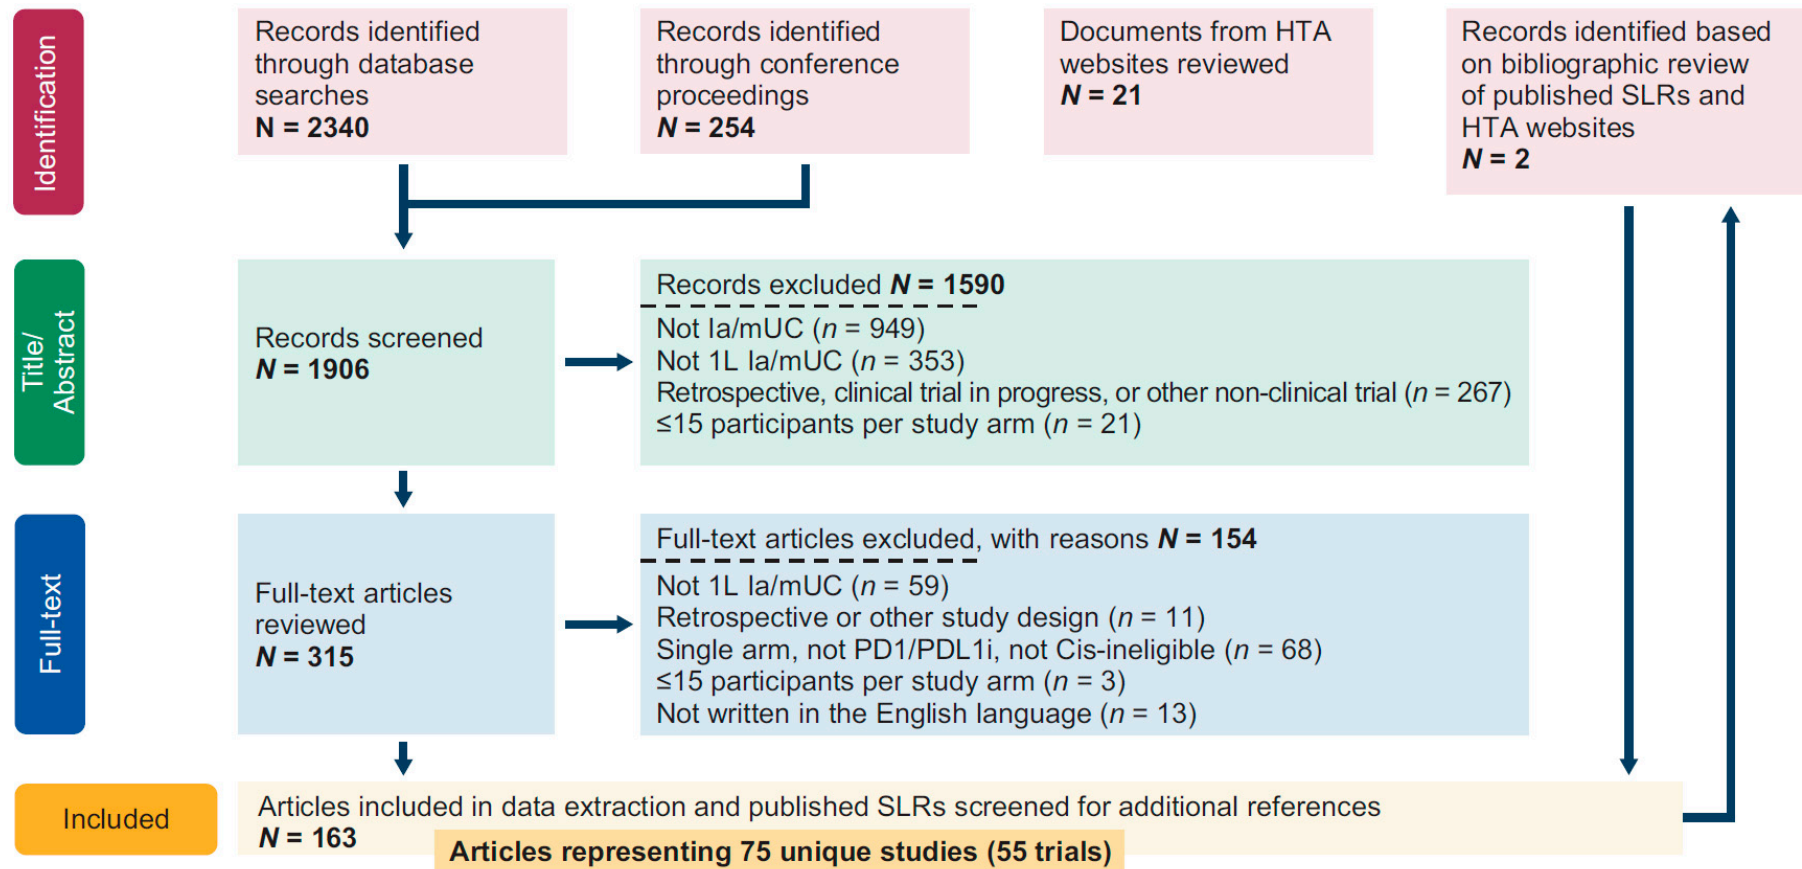

**Supplementary Figure S1.** PRISMA Diagram showing all searches performed in the SLR.

1L, first-line; 1a/mUC, locally advanced or metastatic urothelial carcinoma; Cis, cisplatin; HTA, health technology assessment; PD1, programmed death-1; PDL1i, programmed death-ligand 1 inhibitor; PRISMA, preferred reporting items for systematic reviews and meta-analyses; SLR, systematic literature review.

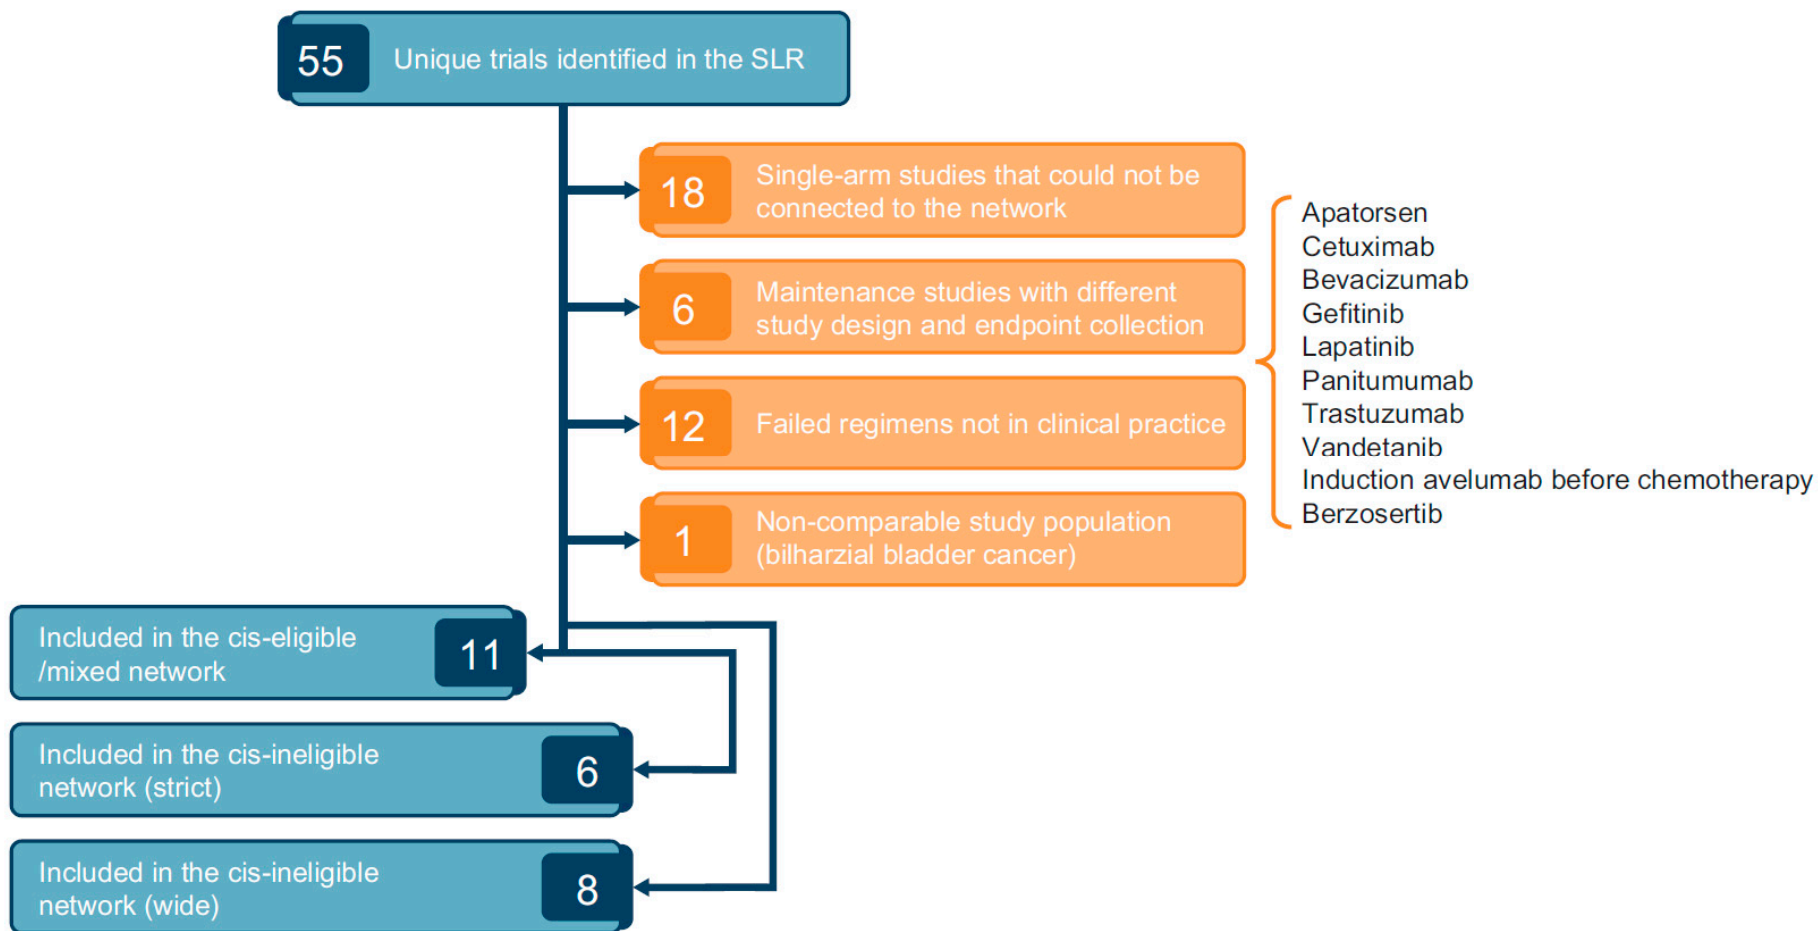

**Supplementary Figure S2.** Study identification and attrition for the NMA.  
Cis, cisplatin; NMA, network meta-analysis; SLR, systematic literature review.

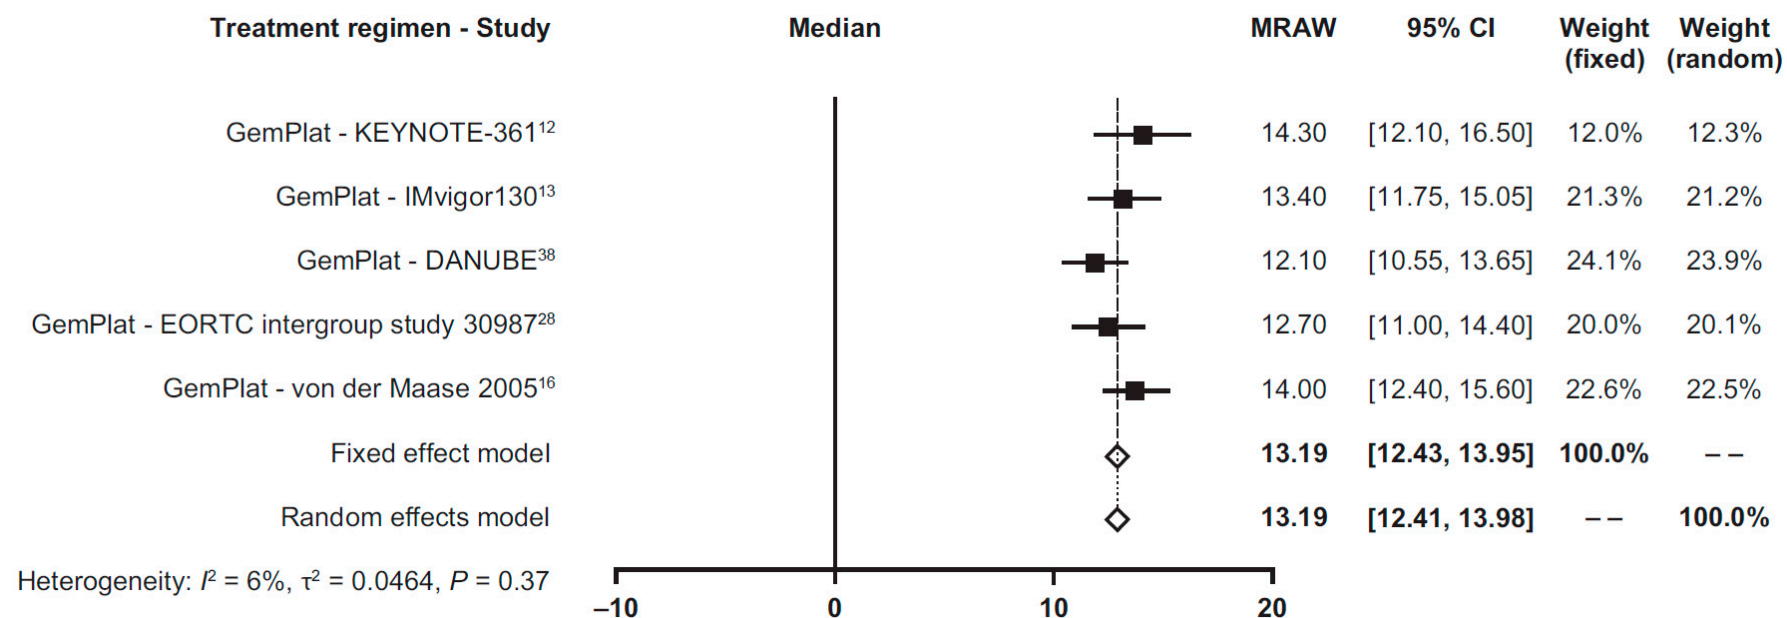

**Supplementary Figure S3.** Median OS for SOC (GemPlat) in the cis-eligible/mixed network.

References = [12,13,16,28,38]

CI, confidence interval; Cis, cisplatin; GemPlat, gemcitabine + platinum (cisplatin or carboplatin); MRAW, raw or untransformed mean; OS, overall survival; SOC, standard of care.

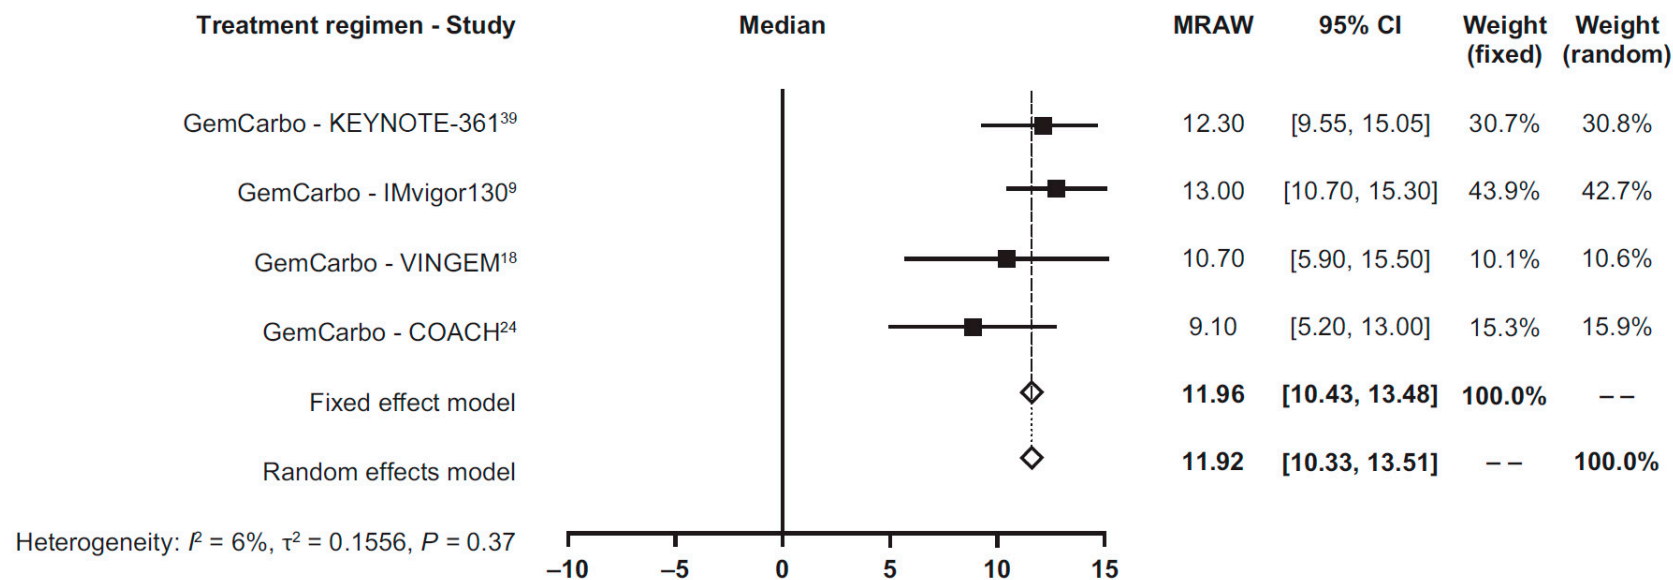

**Supplementary Figure S4.** Median OS for SOC (GemCarbo) in the cis-ineligible (wide) network.

References = [9,18,24,39]

CI, confidence interval; Cis, cisplatin; GemCarbo, gemcitabine + carboplatin; MRAW, raw or untransformed mean; OS, overall survival; SOC, standard of care.

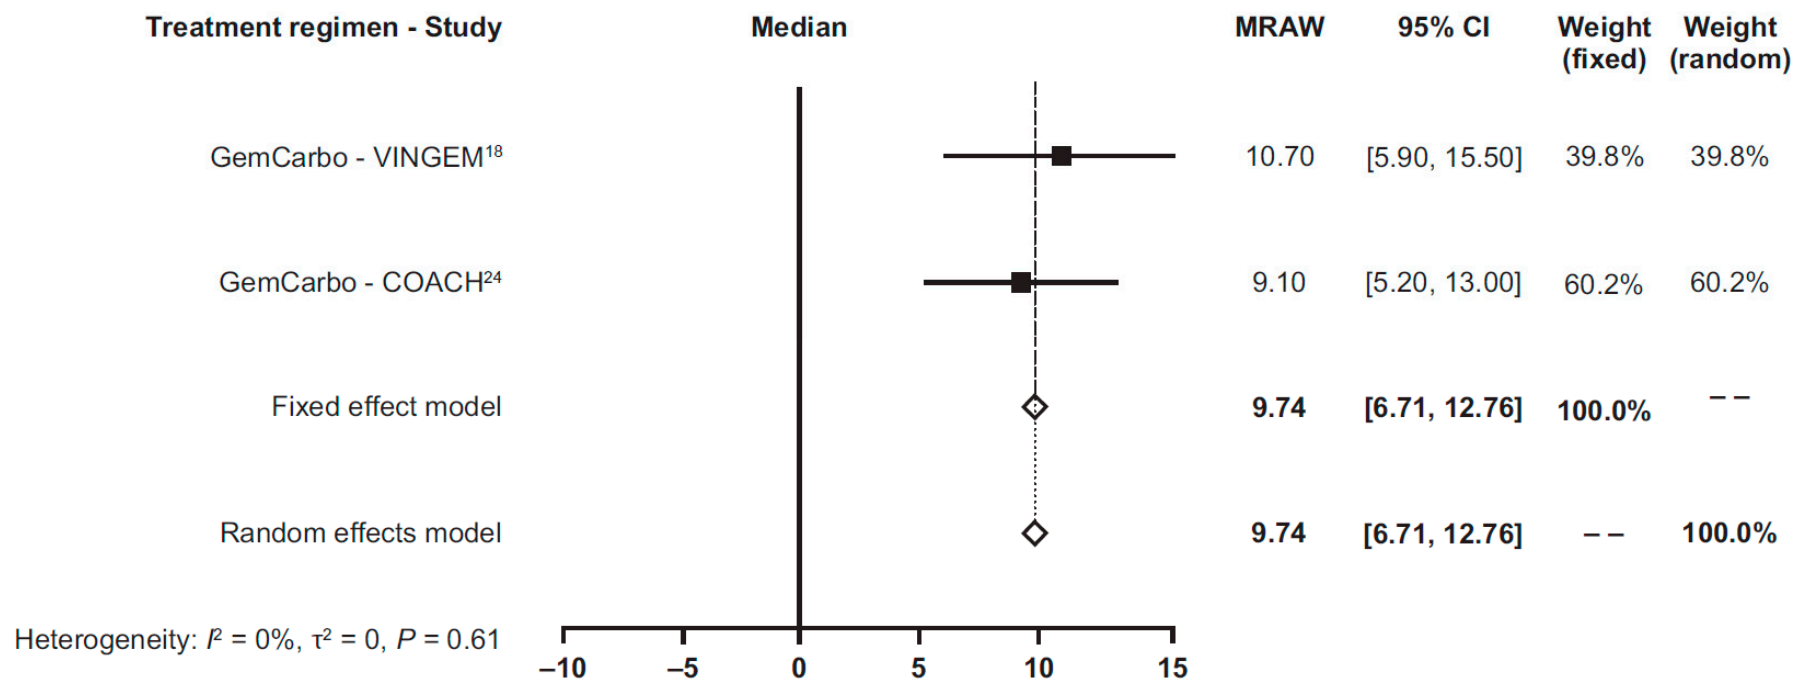

**Supplementary Figure S5.** Median OS for SOC (GemCarbo) in the cis-ineligible (strict) network.

References = [18,24]

CI, confidence interval; Cis, cisplatin; GemCarbo, gemcitabine + carboplatin; MRAW, raw or untransformed mean; OS, overall survival; SOC, standard of care.

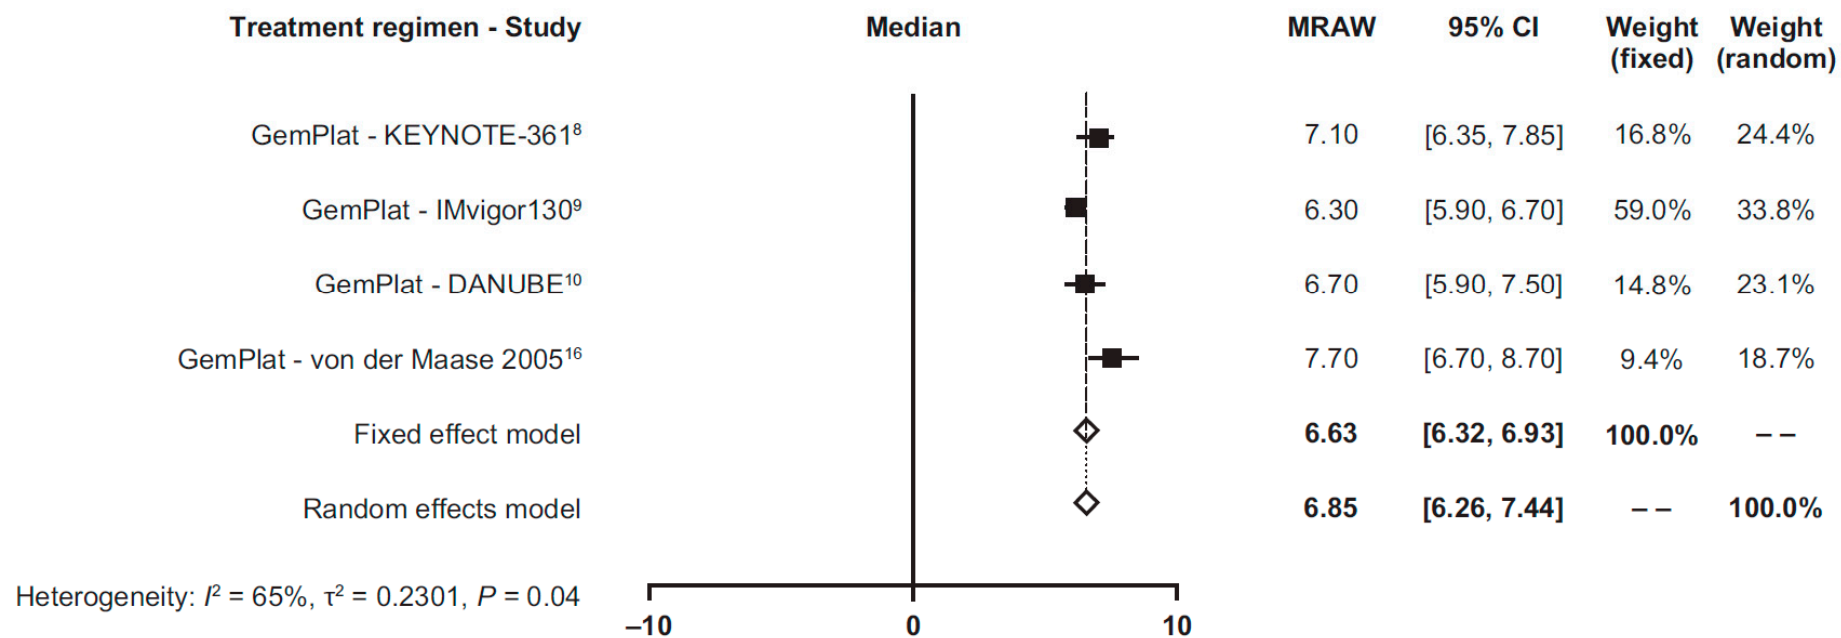

**Supplementary Figure S6.** Median PFS for SOC (GemPlat) in the cis-eligible/mixed network

References = [8,9,10,16]

CI, confidence interval; Cis, cisplatin; GemPlat, gemcitabine + platinum (cisplatin or carboplatin); MRAW, raw or untransformed mean; OS, overall survival; PFS, progression-free survival, SOC, standard of care.

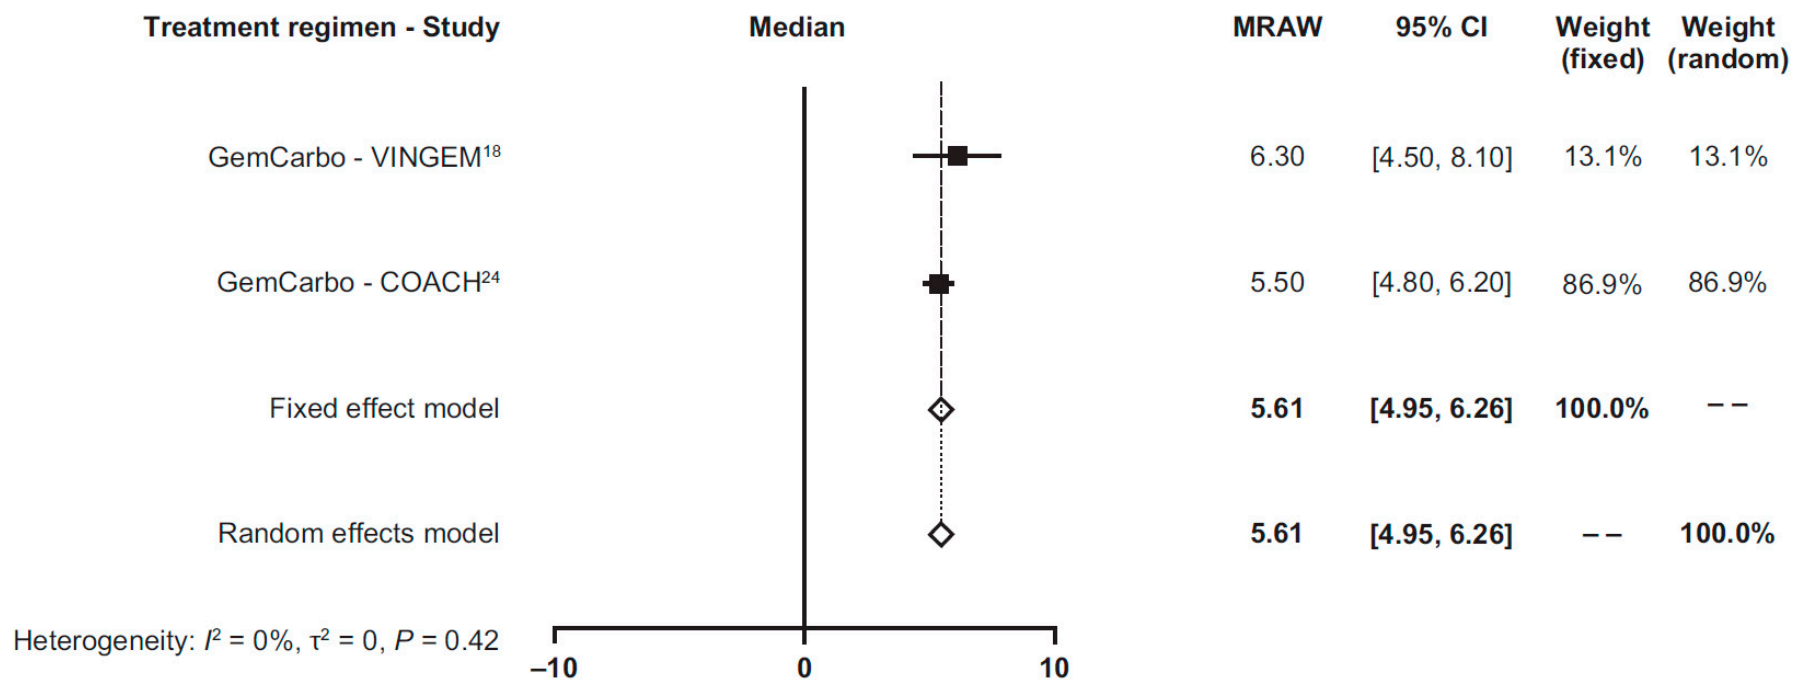

**Supplementary Figure S7.** Median PFS for SOC (GemCarbo) in the overall cis-ineligible networks.

References = [18,24]

CI, confidence interval; Cis, cisplatin; GemCarbo, gemcitabine + carboplatin; MRAW, raw or untransformed mean; PFS, progression-free survival, SOC, standard of care.

**Supplementary Table S1.** Cochrane risk-of-bias tool for randomized trials (RoB2).

| Clinical Trial (Author Year)      | Domain 1: Risk of bias arising from randomization process | Domain 2: Risk of bias due to deviations from the intended interventions | Domain 3: Missing outcome data | Domain 4: Risk of bias in measurement of the outcome | Domain 5: Risk of bias in selection of the reported results | Overall Risk |
|-----------------------------------|-----------------------------------------------------------|--------------------------------------------------------------------------|--------------------------------|------------------------------------------------------|-------------------------------------------------------------|--------------|
| COACH (Park 2020) [24]            | Low                                                       | Low                                                                      | Low                            | Low                                                  | Low                                                         | Low          |
| DANUBE (Powles 2020) [10]         | Low                                                       | Low                                                                      | Low                            | Low                                                  | Low                                                         | Low          |
| EORTC 30924 (Sternberg 2006) [28] | Low                                                       | Low                                                                      | Low                            | Low                                                  | Low                                                         | Low          |
| EORTC 30986 (De Santis 2012) [29] | Low                                                       | Low                                                                      | Low                            | Low                                                  | Some                                                        | Some         |
| EORTC 30987 (Bellmunt 2012) [37]  | High                                                      | Low                                                                      | Low                            | Low                                                  | Low                                                         | High         |
| GETUG V01 (Culine 2011) [30]      | Low                                                       | Low                                                                      | Low                            | Low                                                  | Low                                                         | Low          |
| HE 16/03 (Bamias 2013) [25]       | Some                                                      | High                                                                     | Low                            | Low                                                  | Some                                                        | High         |
| IMvigor130 (Galsky 2020) [9]      | Low                                                       | Some                                                                     | Low                            | Low                                                  | Low                                                         | Some         |
| JASINT1 (De Santis 2016) [31]     | High                                                      | Low                                                                      | Low                            | Low                                                  | Some                                                        | High         |
| KEYNOTE-361 (Powles 2021) [12]    | Low                                                       | Low                                                                      | Low                            | Low                                                  | Low                                                         | Low          |
| Bamias 2004 [32]                  | Some                                                      | Low                                                                      | Low                            | Low                                                  | Some                                                        | Some         |
| Dogliotti 2007 [33]               | High                                                      | Low                                                                      | Low                            | Low                                                  | Low                                                         | High         |
| Dreicer 2004 [34]                 | Some                                                      | Low                                                                      | Low                            | Low                                                  | Low                                                         | Some         |
| Lorusso 2005 [35]                 | High                                                      | Low                                                                      | Low                            | Low                                                  | Low                                                         | High         |
| Siefker-Radke 2002 [36]           | High                                                      | Low                                                                      | Low                            | Low                                                  | Low                                                         | High         |
| von der Maase 2005 [16]           | High                                                      | Low                                                                      | Low                            | Low                                                  | Low                                                         | High         |
| VINGEM (Holmsten 2020) [18]       | Some                                                      | Low                                                                      | Low                            | Low                                                  | Low                                                         | Some         |



**Supplementary Table S2.** Overview of studies in each network.

| Study Name (Citation)                        | Treatment regimen | N   | ORR, % | mPFS, months (95% CI) | mOS. months (95% CI) |
|----------------------------------------------|-------------------|-----|--------|-----------------------|----------------------|
| Cisplatin-Eligible/Mixed                     |                   |     |        |                       |                      |
| KEYNOTE-361 (Alva 2020) [8]                  | Pembro + GemPlat  | 351 | 55     | 8.3 (7.5, 8.5)        | 17.0 (14.5, 19.5)    |
|                                              | Pembro            | 307 | 30     | -                     | 15.6 (12.1, 17.9)    |
|                                              | GemPlat           | 352 | 45     | 7.1 (6.4, 7.9)        | 14.3 (12.3, 16.7)    |
| IMvigor130 (Galsky 2020; Davis 2021) [9, 13] | Atezo + GemPlat   | 451 | 48     | 8.2 (6.5, 8.3)        | 16.1 (14.2, 18.8)    |
|                                              | Atezo             | 362 | 23     | -                     | 15.2 (13.1, 17.7)    |
|                                              | GemPlat           | 400 | 45     | 6.3 (6.2, 7.0)        | 13.4 (11.9, 15.2)    |
| DANUBE (Powles 2020) [10]                    | DUR               | 346 | 26     | 2.3 (1.9, 3.5)        | 13.2 (10.3, 15.0)    |
|                                              | DUR + TREME       | 342 | 36     | 3.7 (3.4, 3.8)        | 15.1 (13.1, 18.0)    |
|                                              | GemPlat           | 344 | 49     | 6.7 (5.7, 7.3)        | 12.1 (10.9, 14.0)    |
| HE 16/03 (Bamias 2013) [25]                  | ddMVAC            | 63  | 60     | -                     | -                    |
|                                              | ddGemCis          | 63  | 65     | -                     | -                    |
| EORTC 30987 (Bellmunt 2012) [37]             | GemCis + PAX      | 312 | 55     | -                     | 15.8 (13.6, 17.5)    |
|                                              | GemCis            | 314 | 44     | -                     | 12.7 (11.0, 14.4)    |
| EORTC 30924 (Sternberg 2006) [28]            | ddMVAC            | 134 | 72     | -                     | -                    |
|                                              | MVAC              | 129 | 58     | -                     | -                    |
| Dreicer 2004 [34]                            | MVAC              | 44  | 28     | -                     | -                    |
|                                              | Carbo + PAX       | 41  | 28     | -                     | -                    |
| Bamias 2004 [32]                             | MVAC              | 109 | 54     | 9.4 (7.4, 11.3)       | 14.2 (12.5, 15.9)    |
|                                              | Cis + DXT         | 111 | 37     | 6.1 (5.6, 6.6)        | 9.3 (12.5, 15.9)     |
| Lorusso 2005 [35]                            | GemCis + PAX      | 42  | 43     | -                     | -                    |
|                                              | GemCis            | 43  | 44     | -                     | -                    |
| von der Maase 2005 [16]                      | MVAC              | 202 | 46     | 8.3 (7.3, 9.7)        | 14.1 (12.3, 15.5)    |
|                                              | GemCis            | 203 | 49     | 7.7 (6.8, 8.8)        | 15.2 (13.2, 17.3)    |
| Dogliotti 2007 [33]                          | GemCis            | 55  | 66     | -                     | -                    |
|                                              | GemCarbo          | 55  | 56     | -                     | -                    |
| Cisplatin-Ineligible (Wide)                  |                   |     |        |                       |                      |
| KEYNOTE-361 (Powles 2021) [39]               | Pembro + GemCarbo | 195 | 47     | -                     | -                    |
|                                              | Pembro            | 170 | 28     | -                     | 14.6 (10.2, 17.9)    |
|                                              | GemCarbo          | 196 | 42     | -                     | 12.3 (10, 15.5)      |
| IMvigor130 (Galsky 2020) [9]                 | Atezo + GemCarbo  | 311 | 48     | -                     | 14.3 (12.0, 16.5)    |
|                                              | Atezo             | 190 | -      | -                     | -                    |
|                                              | GemCarbo          | 183 | 42     | -                     | 13.0 (10.6, 15.2)    |

| Study Name (Citation)             | Treatment regimen | N   | ORR, % | mPFS, months (95% CI) | mOS, months (95% CI) |
|-----------------------------------|-------------------|-----|--------|-----------------------|----------------------|
| DANUBE (Powles 2020) [10]         | DUR + TREME       | 158 | 36     | -                     | -                    |
|                                   | DUR               | 149 | 24     | -                     | -                    |
|                                   | GemPlat           | 151 | 46     | -                     | -                    |
| VINGEM (Holmsten 2020) [18]       | VFL + Gem         | 32  | 63     | 6.2 (4.4, 8.3)        | 12.5 (8.4, 15.8)     |
|                                   | GemCarbo          | 30  | 40     | 6.3 (4.2, 7.8)        | 10.7 (7.4, 17.0)     |
| JASINT1 (De Santis 2016) [31]     | VFL + Carbo       | 35  | 44     | 5.9 (4.2, 9.4)        | 14.0 (8.3, 20.1)     |
|                                   | VFL + Gem         | 34  | 29     | 6.1 (4.6, 10.4)       | 12.8 (9.5, 17.7)     |
| EORTC 30986 (De Santis 2012) [29] | M-CAVI            | 119 | 30     | -                     | -                    |
|                                   | GemCarbo          | 119 | 42     | -                     | -                    |
| GETUG V01 (Culine 2011) [30]      | Gem + OXP         | 22  | 27     | -                     | 8.1 (3.7, 10.7)      |
|                                   | Gem               | 22  | 43     | -                     | 5.4 (3.3, 13.4)      |
| COACH (Park 2020) [24]            | Gem + OXP         | 40  | 55     | 4.4 (2.7, 6.1)        | 11.0 (0.9, 15.0)     |
|                                   | Gem + Carbo       | 39  | 49     | 5.5 (4.8, 6.2)        | 9.1 (5.2, 13.0)      |
| Cisplatin-Ineligible (Strict)     |                   |     |        |                       |                      |
| DANUBE (Powles 2020) [10]         | DUR + TREME       | 158 | 36     | -                     | -                    |
|                                   | DUR               | 149 | 24     | -                     | -                    |
|                                   | GemPlat           | 151 | 46     | -                     | -                    |
| VINGEM (Holmsten 2020) [18]       | VFL + Gem         | 32  | 63     | 6.2 (4.4, 8.3)        | 12.5 (8.4, 15.8)     |
|                                   | GemCarbo          | 30  | 40     | 6.3 (4.2, 7.8)        | 10.7 (7.4, 17.0)     |
| JASINT1 (De Santis 2016) [31]     | VFL + Carbo       | 35  | 44     | 5.9 (4.2, 9.4)        | 14.0 (8.3, 20.1)     |
|                                   | VFL + Gem         | 34  | 29     | 6.1 (4.6, 10.4)       | 12.8 (9.5, 17.7)     |
| EORTC 30986 (De Santis 2012) [29] | M-CAVI            | 119 | 30     | -                     | -                    |
|                                   | GemCarbo          | 119 | 42     | -                     | -                    |
| GETUG V01 (Culine 2011) [30]      | Gem + OXP         | 22  | 27     | -                     | 8.1 (3.7, 10.7)      |
|                                   | Gem               | 22  | 43     | -                     | 5.4 (3.3, 13.4)      |
| COACH (Park 2020) [24]            | Gem + OXP         | 40  | 55     | 4.4 (2.7, 6.1)        | 11.0 (0.9, 15.0)     |
|                                   | GemCarbo          | 39  | 49     | 5.5 (4.8, 6.2)        | 9.1 (5.2, 13.0)      |

Atezo, atezolizumab; Carbo, carboplatin; Cis, cisplatin; CI, confidence interval; ddGemCis, dose-dense gemcitabine + cisplatin; ddMVAC, dose-dense methotrexate + vinblastine + doxorubicin + cisplatin; DUR, durvalumab; DXT, docetaxel; Gem, gemcitabine; GemCarbo, gemcitabine + carboplatin; GemCis, gemcitabine + cisplatin; GemPlat, gemcitabine + platinum (cisplatin or carboplatin); M-CAVI, methotrexate + carboplatin + vinblastine; mOS, median overall survival; mPFS, median progression-free survival; MVAC, methotrexate + vinblastine + doxorubicin + cisplatin; ORR, overall response rate; OXP, oxaliplatin; PAX, paclitaxel; Pembro, pembrolizumab; TREME, tremelimumab; VFL, vinflunine.

**Supplementary Table S3.** League table of relative treatment effects on OS (HR, CrI). Cis-eligible/mixed network.

|                     | ddMVAC                          | ddGemCis                        | Atezo +<br>GemPlat              | DUR +<br>TREME                  | PAX +<br>GemPlat                | Pembro +<br>GemPlat             | MVAC                            | Pembro                          | Atezo                | DUR                  | GemPlat                         | DXT + Cis                       |
|---------------------|---------------------------------|---------------------------------|---------------------------------|---------------------------------|---------------------------------|---------------------------------|---------------------------------|---------------------------------|----------------------|----------------------|---------------------------------|---------------------------------|
| ddMVAC              |                                 | 0.94<br>(0.61, 1.43)            | 1.20<br>(0.82, 1.75)            | 1.22<br>(0.83, 1.77)            | 1.22<br>(0.83, 1.79)            | 1.23<br>(0.84, 1.80)            | <b>**1.31**</b><br>(1.01, 1.72) | 1.32<br>(0.90, 1.93)            | 1.42<br>(0.96, 2.07) | 1.42<br>(0.97, 2.07) | <b>**1.43**</b><br>(1.02, 2.01) | <b>**2.00**</b><br>(1.33, 3.03) |
| ddGemCis            | 1.06<br>(0.70, 1.63)            |                                 | 1.28<br>(0.73, 2.26)            | 1.29<br>(0.73, 2.29)            | 1.29<br>(0.73, 2.29)            | 1.31<br>(0.74, 2.31)            | 1.40<br>(0.84, 2.32)            | 1.40<br>(0.79, 2.47)            | 1.50<br>(0.85, 2.66) | 1.50<br>(0.86, 2.66) | 1.52<br>(0.89, 2.63)            | <b>**2.11**</b><br>(1.17, 3.86) |
| Atezo +<br>GemPlat  | 0.83<br>(0.57, 1.21)            | 0.78<br>(0.44, 1.37)            |                                 | 1.01<br>(0.79, 1.29)            | 1.01<br>(0.79, 1.29)            | 1.02<br>(0.80, 1.30)            | 1.09<br>(0.84, 1.43)            | 1.09<br>(0.85, 1.41)            | 1.18<br>(0.99, 1.40) | 1.18<br>(0.92, 1.50) | <b>**1.19**</b><br>(1.00, 1.41) | <b>**1.66**</b><br>(1.10, 2.52) |
| DUR +<br>TREME      | 0.82<br>(0.56, 1.20)            | 0.77<br>(0.44, 1.37)            | 0.99<br>(0.77, 1.26)            |                                 | 1.00<br>(0.78, 1.28)            | 1.01<br>(0.79, 1.29)            | 1.08<br>(0.82, 1.41)            | 1.08<br>(0.84, 1.39)            | 1.16<br>(0.91, 1.50) | 1.16<br>(0.98, 1.39) | 1.18<br>(0.99, 1.40)            | <b>**1.64**</b><br>(1.08, 2.48) |
| PAX +<br>GemPlat    | 0.82<br>(0.56, 1.20)            | 0.77<br>(0.44, 1.36)            | 0.99<br>(0.77, 1.26)            | 1.00<br>(0.78, 1.28)            |                                 | 1.01<br>(0.79, 1.30)            | 1.08<br>(0.82, 1.42)            | 1.08<br>(0.84, 1.39)            | 1.16<br>(0.91, 1.50) | 1.16<br>(0.91, 1.49) | 1.18<br>(0.99, 1.40)            | <b>**1.64**</b><br>(1.09, 2.49) |
| Pembro +<br>GemPlat | 0.81<br>(0.56, 1.19)            | 0.76<br>(0.43, 1.34)            | 0.98<br>(0.77, 1.25)            | 0.99<br>(0.77, 1.26)            | 0.99<br>(0.77, 1.26)            |                                 | 1.07<br>(0.81, 1.40)            | 1.07<br>(0.89, 1.28)            | 1.15<br>(0.90, 1.48) | 1.15<br>(0.90, 1.47) | 1.16<br>(0.98, 1.38)            | <b>**1.62**</b><br>(1.07, 2.45) |
| MVAC                | <b>**0.76**</b><br>(0.58, 0.99) | 0.72<br>(0.43, 1.18)            | 0.92<br>(0.70, 1.19)            | 0.93<br>(0.71, 1.22)            | 0.93<br>(0.70, 1.22)            | 0.94<br>(0.72, 1.23)            |                                 | 1.00<br>(0.76, 1.32)            | 1.08<br>(0.82, 1.42) | 1.08<br>(0.83, 1.42) | 1.09<br>(0.89, 1.34)            | <b>**1.52**</b><br>(1.11, 2.08) |
| Pembro              | 0.76<br>(0.52, 1.12)            | 0.72<br>(0.40, 1.26)            | 0.91<br>(0.71, 1.17)            | 0.92<br>(0.72, 1.19)            | 0.93<br>(0.72, 1.19)            | 0.94<br>(0.78, 1.12)            | 1.00<br>(0.76, 1.31)            |                                 | 1.08<br>(0.83, 1.39) | 1.08<br>(0.84, 1.38) | 1.09<br>(0.91, 1.30)            | <b>**1.52**</b><br>(1.00, 2.30) |
| Atezo               | 0.71<br>(0.48, 1.04)            | 0.67<br>(0.38, 1.18)            | 0.85<br>(0.71, 1.01)            | 0.86<br>(0.67, 1.10)            | 0.86<br>(0.67, 1.10)            | 0.87<br>(0.68, 1.12)            | 0.93<br>(0.70, 1.23)            | 0.93<br>(0.72, 1.20)            |                      | 1.00<br>(0.78, 1.29) | 1.01<br>(0.84, 1.21)            | 1.41<br>(0.93, 2.15)            |
| DUR                 | 0.71<br>(0.48, 1.03)            | 0.67<br>(0.38, 1.17)            | 0.85<br>(0.67, 1.08)            | 0.86<br>(0.72, 1.02)            | 0.86<br>(0.67, 1.10)            | 0.87<br>(0.68, 1.11)            | 0.93<br>(0.71, 1.21)            | 0.93<br>(0.72, 1.19)            | 1.00<br>(0.78, 1.28) |                      | 1.01<br>(0.85, 1.20)            | 1.41<br>(0.93, 2.13)            |
| GemPlat             | <b>**0.70**</b><br>(0.50, 0.98) | 0.66<br>(0.38, 1.12)            | <b>**0.84**</b><br>(0.71, 1.00) | 0.85<br>(0.71, 1.01)            | 0.85<br>(0.71, 1.01)            | 0.86<br>(0.72, 1.02)            | 0.92<br>(0.75, 1.13)            | 0.92<br>(0.77, 1.10)            | 0.99<br>(0.83, 1.18) | 0.99<br>(0.84, 1.17) |                                 | 1.39<br>(0.96, 2.03)            |
| DXT + Cis           | <b>**0.50**</b><br>(0.33, 0.75) | <b>**0.47**</b><br>(0.26, 0.85) | <b>**0.60**</b><br>(0.40, 0.91) | <b>**0.61**</b><br>(0.40, 0.93) | <b>**0.61**</b><br>(0.40, 0.92) | <b>**0.62**</b><br>(0.41, 0.93) | <b>**0.66**</b><br>(0.48, 0.90) | <b>**0.66**</b><br>(0.44, 1.00) | 0.71<br>(0.47, 1.07) | 0.71<br>(0.47, 1.08) | 0.72<br>(0.49, 1.04)            |                                 |

**\*\***indicates statistical significance.

A fixed effect model was used in this analysis as heterogeneity between studies was acceptable according to Cochrane's Q and Higgin's I2 criteria. [11]

Atezo, atezolizumab; Cis, cisplatin; CrI, credible interval; ddGemCis, dose-dense gemcitabine + cisplatin; ddMVAC, dose-dense methotrexate + vinblastine + doxorubicin + cisplatin; DUR, durvalumab; DXT, docetaxel; GemPlat, gemcitabine + platinum (cisplatin or carboplatin); HR, hazard ratio; MVAC, methotrexate + vinblastine + doxorubicin + cisplatin; OS, overall survival; PAX, paclitaxel; Pembro, pembrolizumab; TREME, tremelimumab.

**Supplementary Table S4.** League table of relative treatment effects on OS (HR, CrI). Cis-ineligible (wide) network.

|                 | Pembro               | Pembro + GemCis      | Atezo + GemCis       | Atezo                | VFL + Gem            | GemCis               | OXP + Gem            |
|-----------------|----------------------|----------------------|----------------------|----------------------|----------------------|----------------------|----------------------|
| Pembro          |                      | 1.01<br>(0.79)       | 1.10<br>(0.80, 1.50) | 1.17<br>(0.83, 1.64) | 1.30<br>(0.69, 2.46) | 1.21<br>(0.94, 1.54) | 1.68<br>(0.97, 2.89) |
| Pembro + GemCis | 0.99<br>(0.78, 1.26) |                      | 1.08<br>(0.80, 1.47) | 1.15<br>(0.83, 1.61) | 1.28<br>(0.69, 2.41) | 1.19<br>(0.94, 1.50) | 1.66<br>(0.95, 2.83) |
| Atezo + GemCis  | 0.91<br>(0.67, 1.25) | 0.92<br>(0.68, 1.25) |                      | 1.07<br>(0.85, 1.34) | 1.18<br>(0.64, 2.20) | 1.10<br>(0.90, 1.34) | 1.53<br>(0.90, 2.58) |
| Atezo           | 0.85<br>(0.61, 1.20) | 0.87<br>(0.62, 1.21) | 0.94<br>(0.75, 1.18) |                      | 1.11<br>(0.59, 2.09) | 1.03<br>(0.81, 1.31) | 1.43<br>(0.83, 2.47) |
| VFL + Gem       | 0.77<br>(0.41, 1.45) | 0.78<br>(0.41, 1.46) | 0.85<br>(0.45, 1.55) | 0.90<br>(0.48, 1.68) |                      | 0.93<br>(0.51, 1.65) | 1.29<br>(0.60, 2.75) |
| GemCis          | 0.83<br>(0.65, 1.06) | 0.84<br>(0.67, 1.06) | 0.91<br>(0.74, 1.11) | 0.97<br>(0.76, 1.23) | 1.07<br>(0.61, 1.94) |                      | 1.39<br>(0.85, 2.26) |
| OXP + Gem       | 0.60<br>(0.35, 1.04) | 0.60<br>(0.35, 1.05) | 0.65<br>(0.39, 1.11) | 0.70<br>(0.41, 1.21) | 0.77<br>(0.36, 1.68) | 0.72<br>(0.44, 1.18) |                      |

A fixed effect model was used in this analysis as heterogeneity between studies was acceptable according to Cochrane's Q and Higgin's I2 criteria. [11]

Atezo, atezolizumab; Cis, cisplatin; CrI, credible interval; Gem, gemcitabine; GemCis, gemcitabine + cisplatin; HR, hazard ratio; MVAC, methotrexate + vinblastine + doxorubicin + cisplatin; OS, overall survival; OXP, oxaliplatin; Pembro, pembrolizumab; VFL, vinflunine.

**Supplementary Table S5.** League table of relative treatment effects on OS (HR, CrI). Cis-ineligible (strict) network.

|             | DUR + TREME          | DUR                  | GemCis               | VFL + Gem            | OXP + Gem            |
|-------------|----------------------|----------------------|----------------------|----------------------|----------------------|
| DUR + TREME |                      | 1.08<br>(0.84, 1.39) | 1.16<br>(0.90, 1.49) | 1.26<br>(0.66, 2.35) | 1.61<br>(0.93, 2.79) |
| DUR         | 0.92<br>(0.72, 1.19) |                      | 1.07<br>(0.83, 1.38) | 1.16<br>(0.61, 2.18) | 1.49<br>(0.85, 2.57) |
| GemCis      | 0.86<br>(0.67, 1.11) | 0.93<br>(0.72, 1.20) |                      | 1.08<br>(0.60, 1.92) | 1.39<br>(0.85, 2.26) |
| VFL + Gem   | 0.80<br>(0.43, 1.51) | 0.86<br>(0.46, 1.63) | 0.93<br>(0.52, 1.66) |                      | 1.29<br>(0.61, 2.75) |
| OXP + Gem   | 0.62<br>(0.36, 1.08) | 0.67<br>(0.39, 1.17) | 0.72<br>(0.44, 1.18) | 0.78<br>(0.36, 1.64) |                      |

A fixed effect model was used in this analysis as heterogeneity between studies was acceptable according to Cochrane's Q and Higgin's I2 criteria. [11]

Cis, cisplatin; CrI, credible interval; DUR, durvalumab; Gem, gemcitabine; GemCis, gemcitabine + cisplatin; HR, hazard ratio; OS, overall survival; OXP, oxaliplatin; TREME, tremelimumab; VFL, vinflunine.

**Supplementary Table S6.** League table of relative treatment effects on PFS (HR, CrI), Cis-eligible/mixed.

|                     | ddGemCis                 | ddMVAC                   | Pembro +<br>GemPlat      | Atezo +<br>GemPlat       | DUR +<br>TREME           | PAX +<br>GemPlat         | MVAC                     | GemPlat                  | Pembro                   | DXT + Cis                |
|---------------------|--------------------------|--------------------------|--------------------------|--------------------------|--------------------------|--------------------------|--------------------------|--------------------------|--------------------------|--------------------------|
| ddGemCis            |                          | 1.27<br>(0.82, 1.96)     | 1.47<br>(0.82, 2.59)     | 1.55<br>(0.87, 2.71)     | 1.62<br>(0.91, 2.84)     | 1.64<br>(0.92, 2.88)     | **1.73**<br>(1.04, 2.87) | **1.88**<br>(1.09, 3.22) | **2.48**<br>(1.39, 4.41) | **2.99**<br>(1.61, 5.46) |
| ddMVAC              | 0.79<br>(0.51, 1.22)     |                          | 1.16<br>(0.79, 1.69)     | 1.22<br>(0.84, 1.76)     | 1.28<br>(0.88, 1.86)     | 1.29<br>(0.89, 1.87)     | **1.37**<br>(1.05, 1.78) | **1.49**<br>(1.07, 2.08) | **1.96**<br>(1.34, 2.87) | **2.37**<br>(1.54, 3.60) |
| Pembro +<br>GemPlat | 0.68<br>(0.39, 1.21)     | 0.86<br>(0.59, 1.26)     |                          | 1.05<br>(0.83, 1.33)     | 1.10<br>(0.87, 1.40)     | 1.12<br>(0.87, 1.43)     | 1.18<br>(0.90, 1.54)     | **1.28**<br>(1.07, 1.53) | **1.69**<br>(1.41, 2.03) | **2.04**<br>(1.33, 3.14) |
| Atezo +<br>GemPlat  | 0.65<br>(0.37, 1.15)     | 0.82<br>(0.57, 1.19)     | 0.95<br>(0.75, 1.21)     |                          | 1.05<br>(0.84, 1.31)     | 1.06<br>(0.85, 1.33)     | 1.12<br>(0.86, 1.45)     | **1.22**<br>(1.04, 1.43) | **1.60**<br>(1.26, 2.05) | **1.94**<br>(1.26, 2.95) |
| DUR +<br>TREME      | 0.62<br>(0.35, 1.09)     | 0.78<br>(0.54, 1.13)     | 0.91<br>(0.71, 1.16)     | 0.95<br>(0.76, 1.20)     |                          | 1.01<br>(0.81, 1.27)     | 1.07<br>(0.82, 1.39)     | 1.16<br>(0.99, 1.37)     | **1.53**<br>(1.20, 1.96) | **1.85**<br>(1.21, 2.81) |
| PAX +<br>GemPlat    | 0.61<br>(0.35, 1.09)     | 0.77<br>(0.53, 1.12)     | 0.90<br>(0.70, 1.15)     | 0.94<br>(0.75, 1.18)     | 0.99<br>(0.79, 1.24)     |                          | 1.06<br>(0.81, 1.37)     | 1.15<br>(0.98, 1.35)     | **1.51**<br>(1.19, 1.95) | **1.83**<br>(1.19, 2.80) |
| MVAC                | **0.58**<br>(0.35, 0.97) | **0.73**<br>(0.56, 0.96) | 0.85<br>(0.65, 1.11)     | 0.89<br>(0.69, 1.16)     | 0.94<br>(0.72, 1.21)     | 0.95<br>(0.73, 1.23)     |                          | 1.09<br>(0.89, 1.34)     | **1.44**<br>(1.09, 1.89) | **1.73**<br>(1.23, 2.42) |
| GemPlat             | **0.53**<br>(0.31, 0.92) | **0.67**<br>(0.48, 0.94) | **0.78**<br>(0.65, 0.93) | **0.82**<br>(0.70, 0.96) | 0.86<br>(0.73, 1.01)     | 0.87<br>(0.74, 1.02)     | 0.92<br>(0.75, 1.13)     |                          | **1.32**<br>(1.10, 1.59) | **1.59**<br>(1.07, 2.35) |
| Pembro              | **0.40**<br>(0.23, 0.72) | **0.51**<br>(0.35, 0.75) | **0.59**<br>(0.49, 0.71) | **0.62**<br>(0.49, 0.79) | **0.65**<br>(0.51, 0.83) | **0.66**<br>(0.51, 0.84) | **0.70**<br>(0.53, 0.92) | **0.76**<br>(0.63, 0.91) |                          | 1.20<br>(0.78, 1.86)     |
| DXT +<br>Cis        | **0.33**<br>(0.18, 0.62) | **0.42**<br>(0.28, 0.65) | **0.49**<br>(0.32, 0.75) | **0.52**<br>(0.34, 0.79) | **0.54**<br>(0.36, 0.83) | **0.55**<br>(0.36, 0.84) | **0.58**<br>(0.41, 0.81) | **0.63**<br>(0.43, 0.94) | 0.83<br>(0.54, 1.28)     |                          |

\*\*indicates statistical significance. A fixed effect model was used in this analysis as heterogeneity between studies was acceptable according to Cochrane's Q and Higgin's I<sup>2</sup> criteria. [11]

Atezo, atezolizumab; Cis, cisplatin;; ddGemCis, dose-dense gemcitabine + cisplatin; ddMVAC, dose-dense methotrexate + vinblastine + doxorubicin + cisplatin; DUR, durvalumab; DXT, docetaxel; GemPlat, gemcitabine + platinum (cisplatin or carboplatin); HR, hazard ratio; PAX, paclitaxel; Pembro, pembrolizumab; PFS, progression-free survival; TREME, tremelimumab.

**Supplementary Table S7.** League table of relative treatment effects on PFS (HR, CrI). Cis-ineligible (wide) network.

|                    | VFL + Gem            | Atezo +<br>GemCis    | Pembro +<br>GemCis   | M-CAVI               | GemCis               | OXP +<br>Gem         |
|--------------------|----------------------|----------------------|----------------------|----------------------|----------------------|----------------------|
| VFL +<br>Gem       |                      | 1.11<br>(0.64, 1.95) | 1.14<br>(0.64, 2.03) | 1.28<br>(0.71, 2.29) | 1.33<br>(0.78, 2.26) | 1.44<br>(0.70, 2.96) |
| Atezo +<br>GemCis  | 0.90<br>(0.51, 1.57) |                      | 1.02<br>(0.76, 1.39) | 1.14<br>(0.83, 1.57) | 1.19<br>(0.99, 1.44) | 1.30<br>(0.77, 2.17) |
| Pembro +<br>GemCis | 0.88<br>(0.49, 1.57) | 0.98<br>(0.72, 1.32) |                      | 1.12<br>(0.79, 1.59) | 1.17<br>(0.92, 1.48) | 1.27<br>(0.74, 2.16) |
| M-CAVI             | 0.78<br>(0.44, 1.41) | 0.87<br>(0.64, 1.20) | 0.89<br>(0.63, 1.27) |                      | 1.04<br>(0.80, 1.35) | 1.13<br>(0.66, 1.94) |
| GemCis             | 0.75<br>(0.44, 1.28) | 0.84<br>(0.70, 1.01) | 0.86<br>(0.68, 1.09) | 0.96<br>(0.74, 1.25) |                      | 1.09<br>(0.67, 1.76) |
| OXP +<br>Gem       | 0.69<br>(0.34, 1.42) | 0.77<br>(0.46, 1.30) | 0.79<br>(0.46, 1.35) | 0.88<br>(0.51, 1.53) | 0.92<br>(0.57, 1.49) |                      |

A fixed effect model was used in this analysis as heterogeneity between studies was acceptable according to Cochrane's Q and Higgin's I2 criteria. [11]

Atezo, atezolizumab; Cis, cisplatin; Gem, gemcitabine; GemCis, gemcitabine + cisplatin; HR, hazard ratio; M-CAVI, methotrexate + carboplatin + vinblastine; OXP, oxaliplatin; Pembro, pembrolizumab; PFS, progression-free survival; OXP, oxaliplatin; TREME, tremelimumab; VFL, vinflunine.

**Supplementary Table S8.** League table of relative treatment effects on PFS (HR, CrI). Cis-ineligible (strict) network.

|           | VFL + Gem            | M-CAVI               | GemCis               | OXP + Gem            |
|-----------|----------------------|----------------------|----------------------|----------------------|
| VFL + Gem |                      | 1.28<br>(0.70, 2.33) | 1.33<br>(0.78, 2.27) | 1.45<br>(0.70, 2.95) |
| M-CAVI    | 0.78<br>(0.43, 1.42) |                      | 1.04<br>(0.80, 1.36) | 1.13<br>(0.66, 1.96) |
| GemCis    | 0.75<br>(0.44, 1.28) | 0.96<br>(0.74, 1.25) |                      | 1.09<br>(0.67, 1.76) |
| OXP + Gem | 0.69<br>(0.34, 1.42) | 0.88<br>(0.51, 1.52) | 0.92<br>(0.57, 1.48) |                      |

A fixed effect model was used in this analysis as heterogeneity between studies was acceptable according to Cochrane's Q and Higgin's I2 criteria. [11]

Cis, cisplatin; GemCis, gemcitabine + cisplatin; Gem, gemcitabine; HR, hazard ratio; M-CAVI, methotrexate + carboplatin + vinblastine; OXP, oxaliplatin; PFS, progression-free survival; VFL, vinflunine.
